# Supplementary material
Source: MDPI journal article supplement (https://www.mdpi.com/1996-1073/13/23/6221)

Figure A1 - Water supply system - unit exergy losses for pipes report

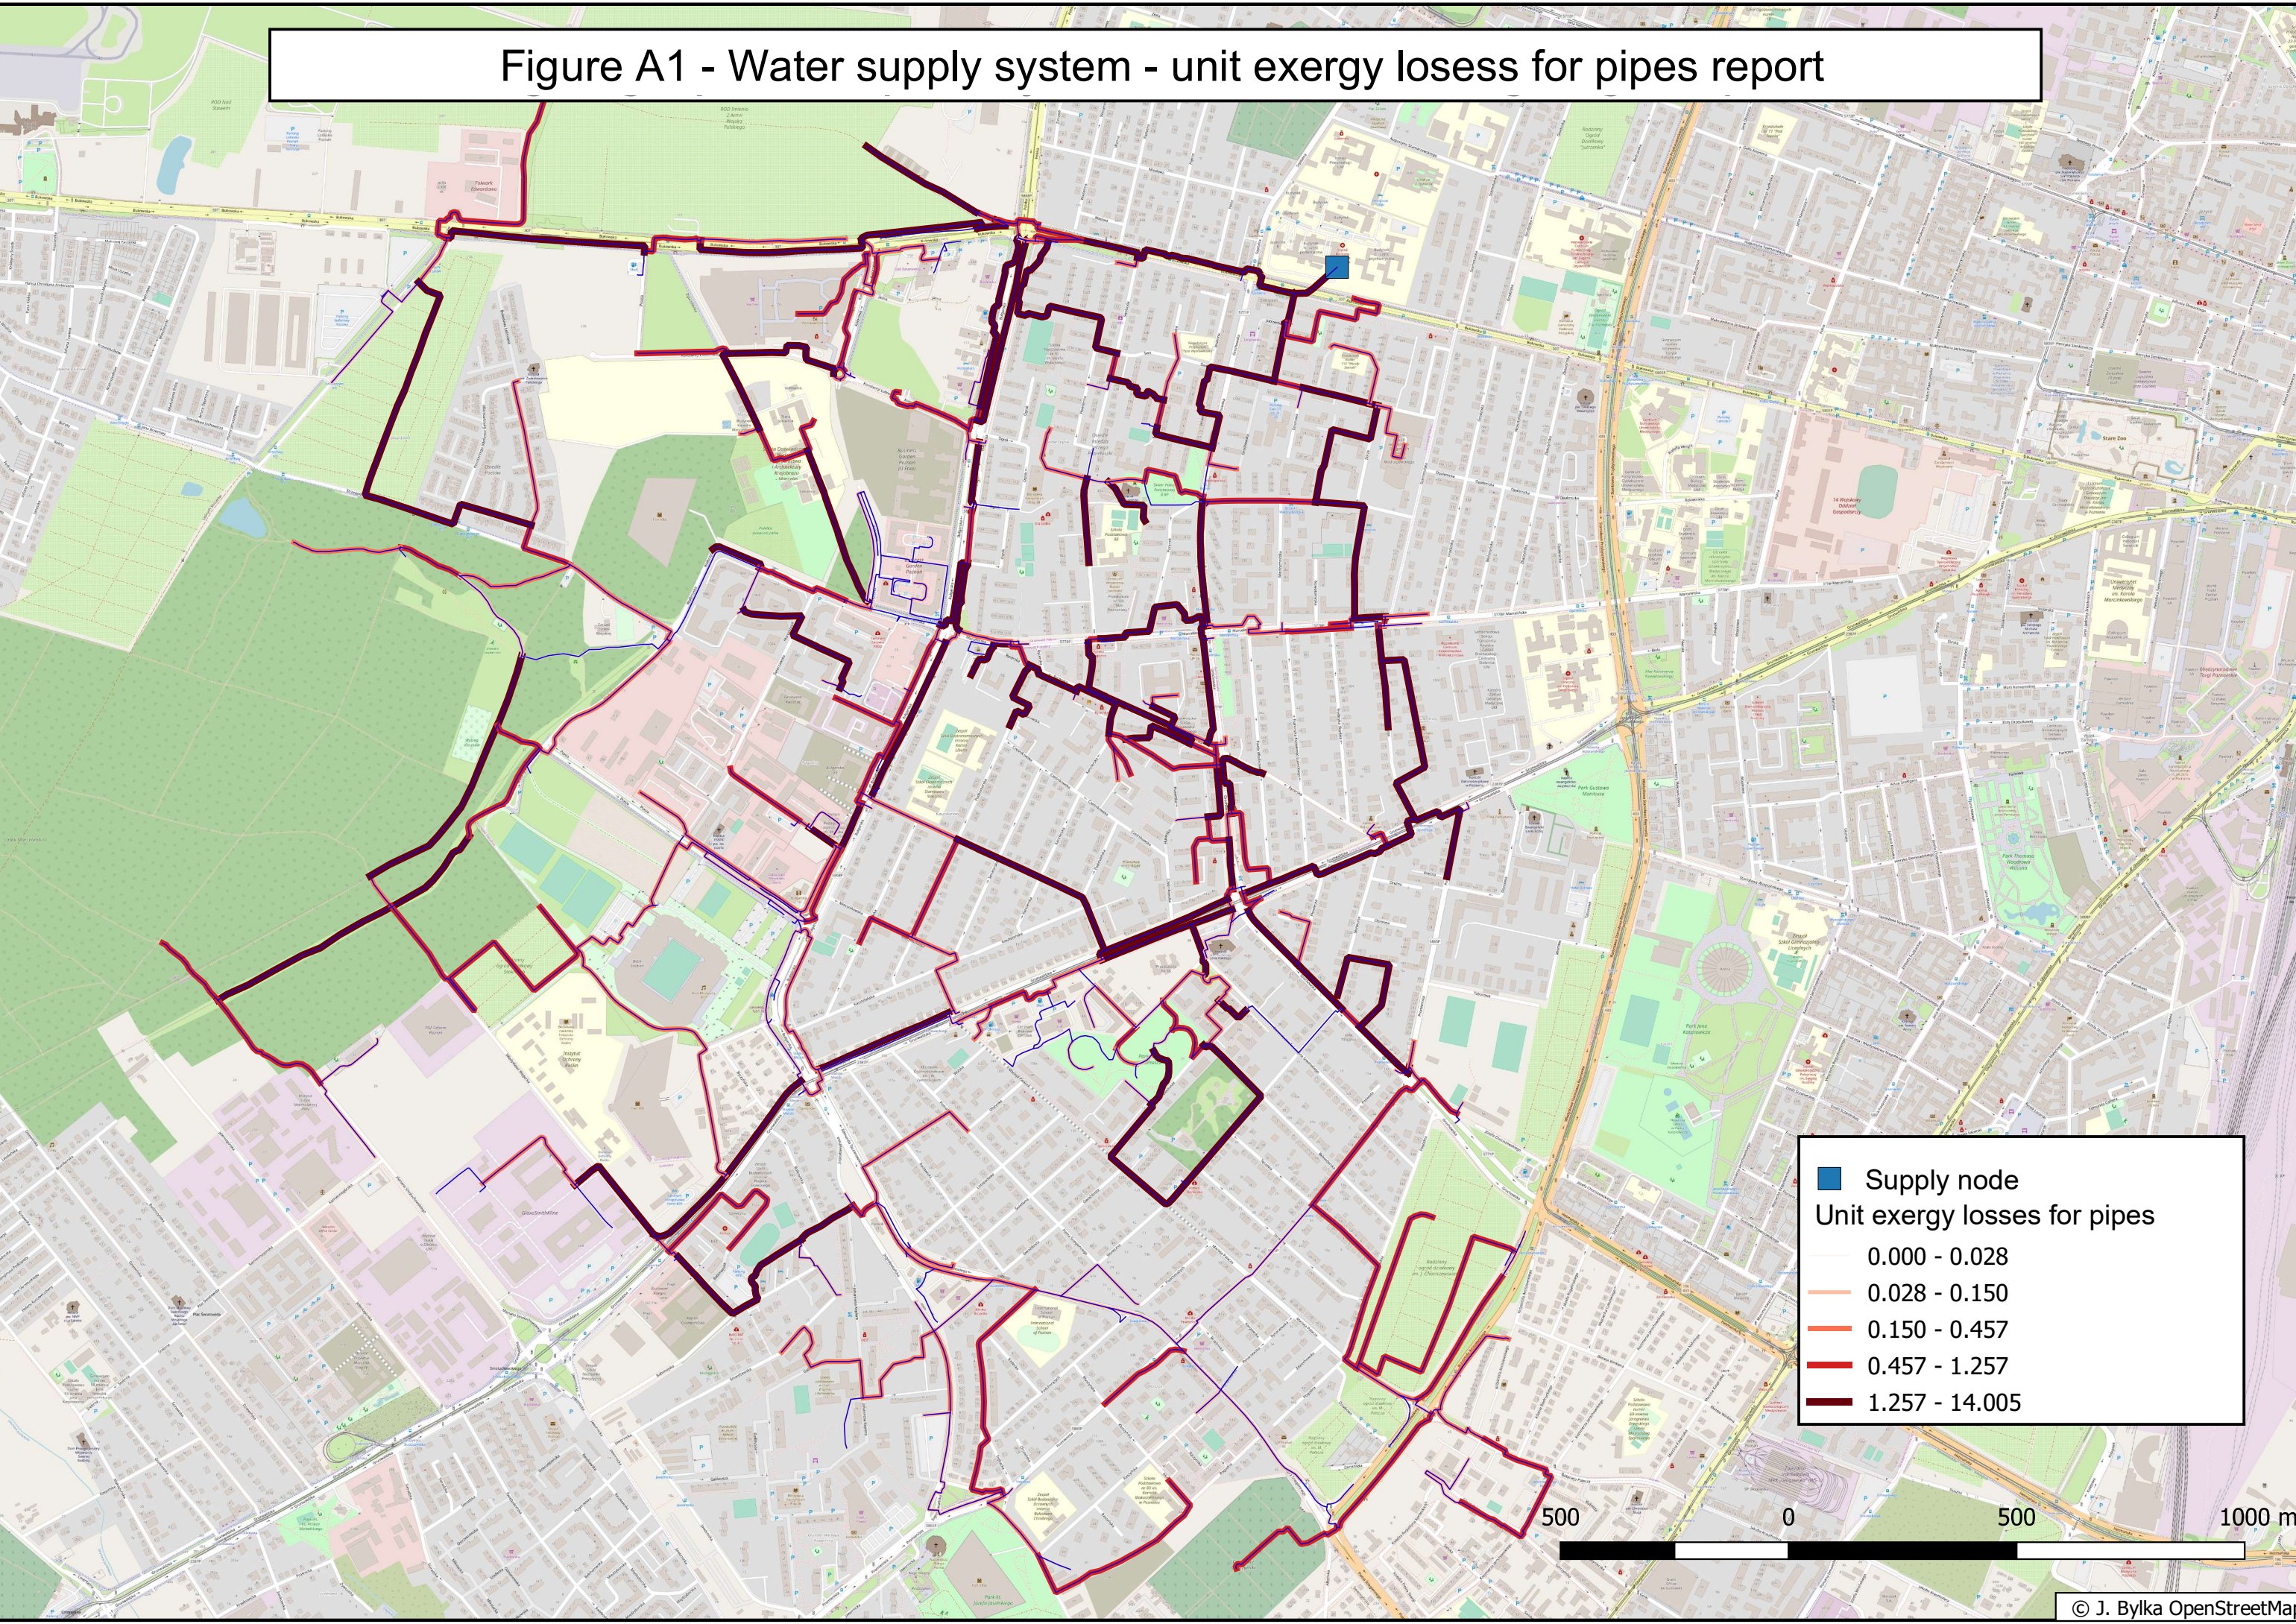



Figure A2 - Water supply system - unit exergy losses for nodes report

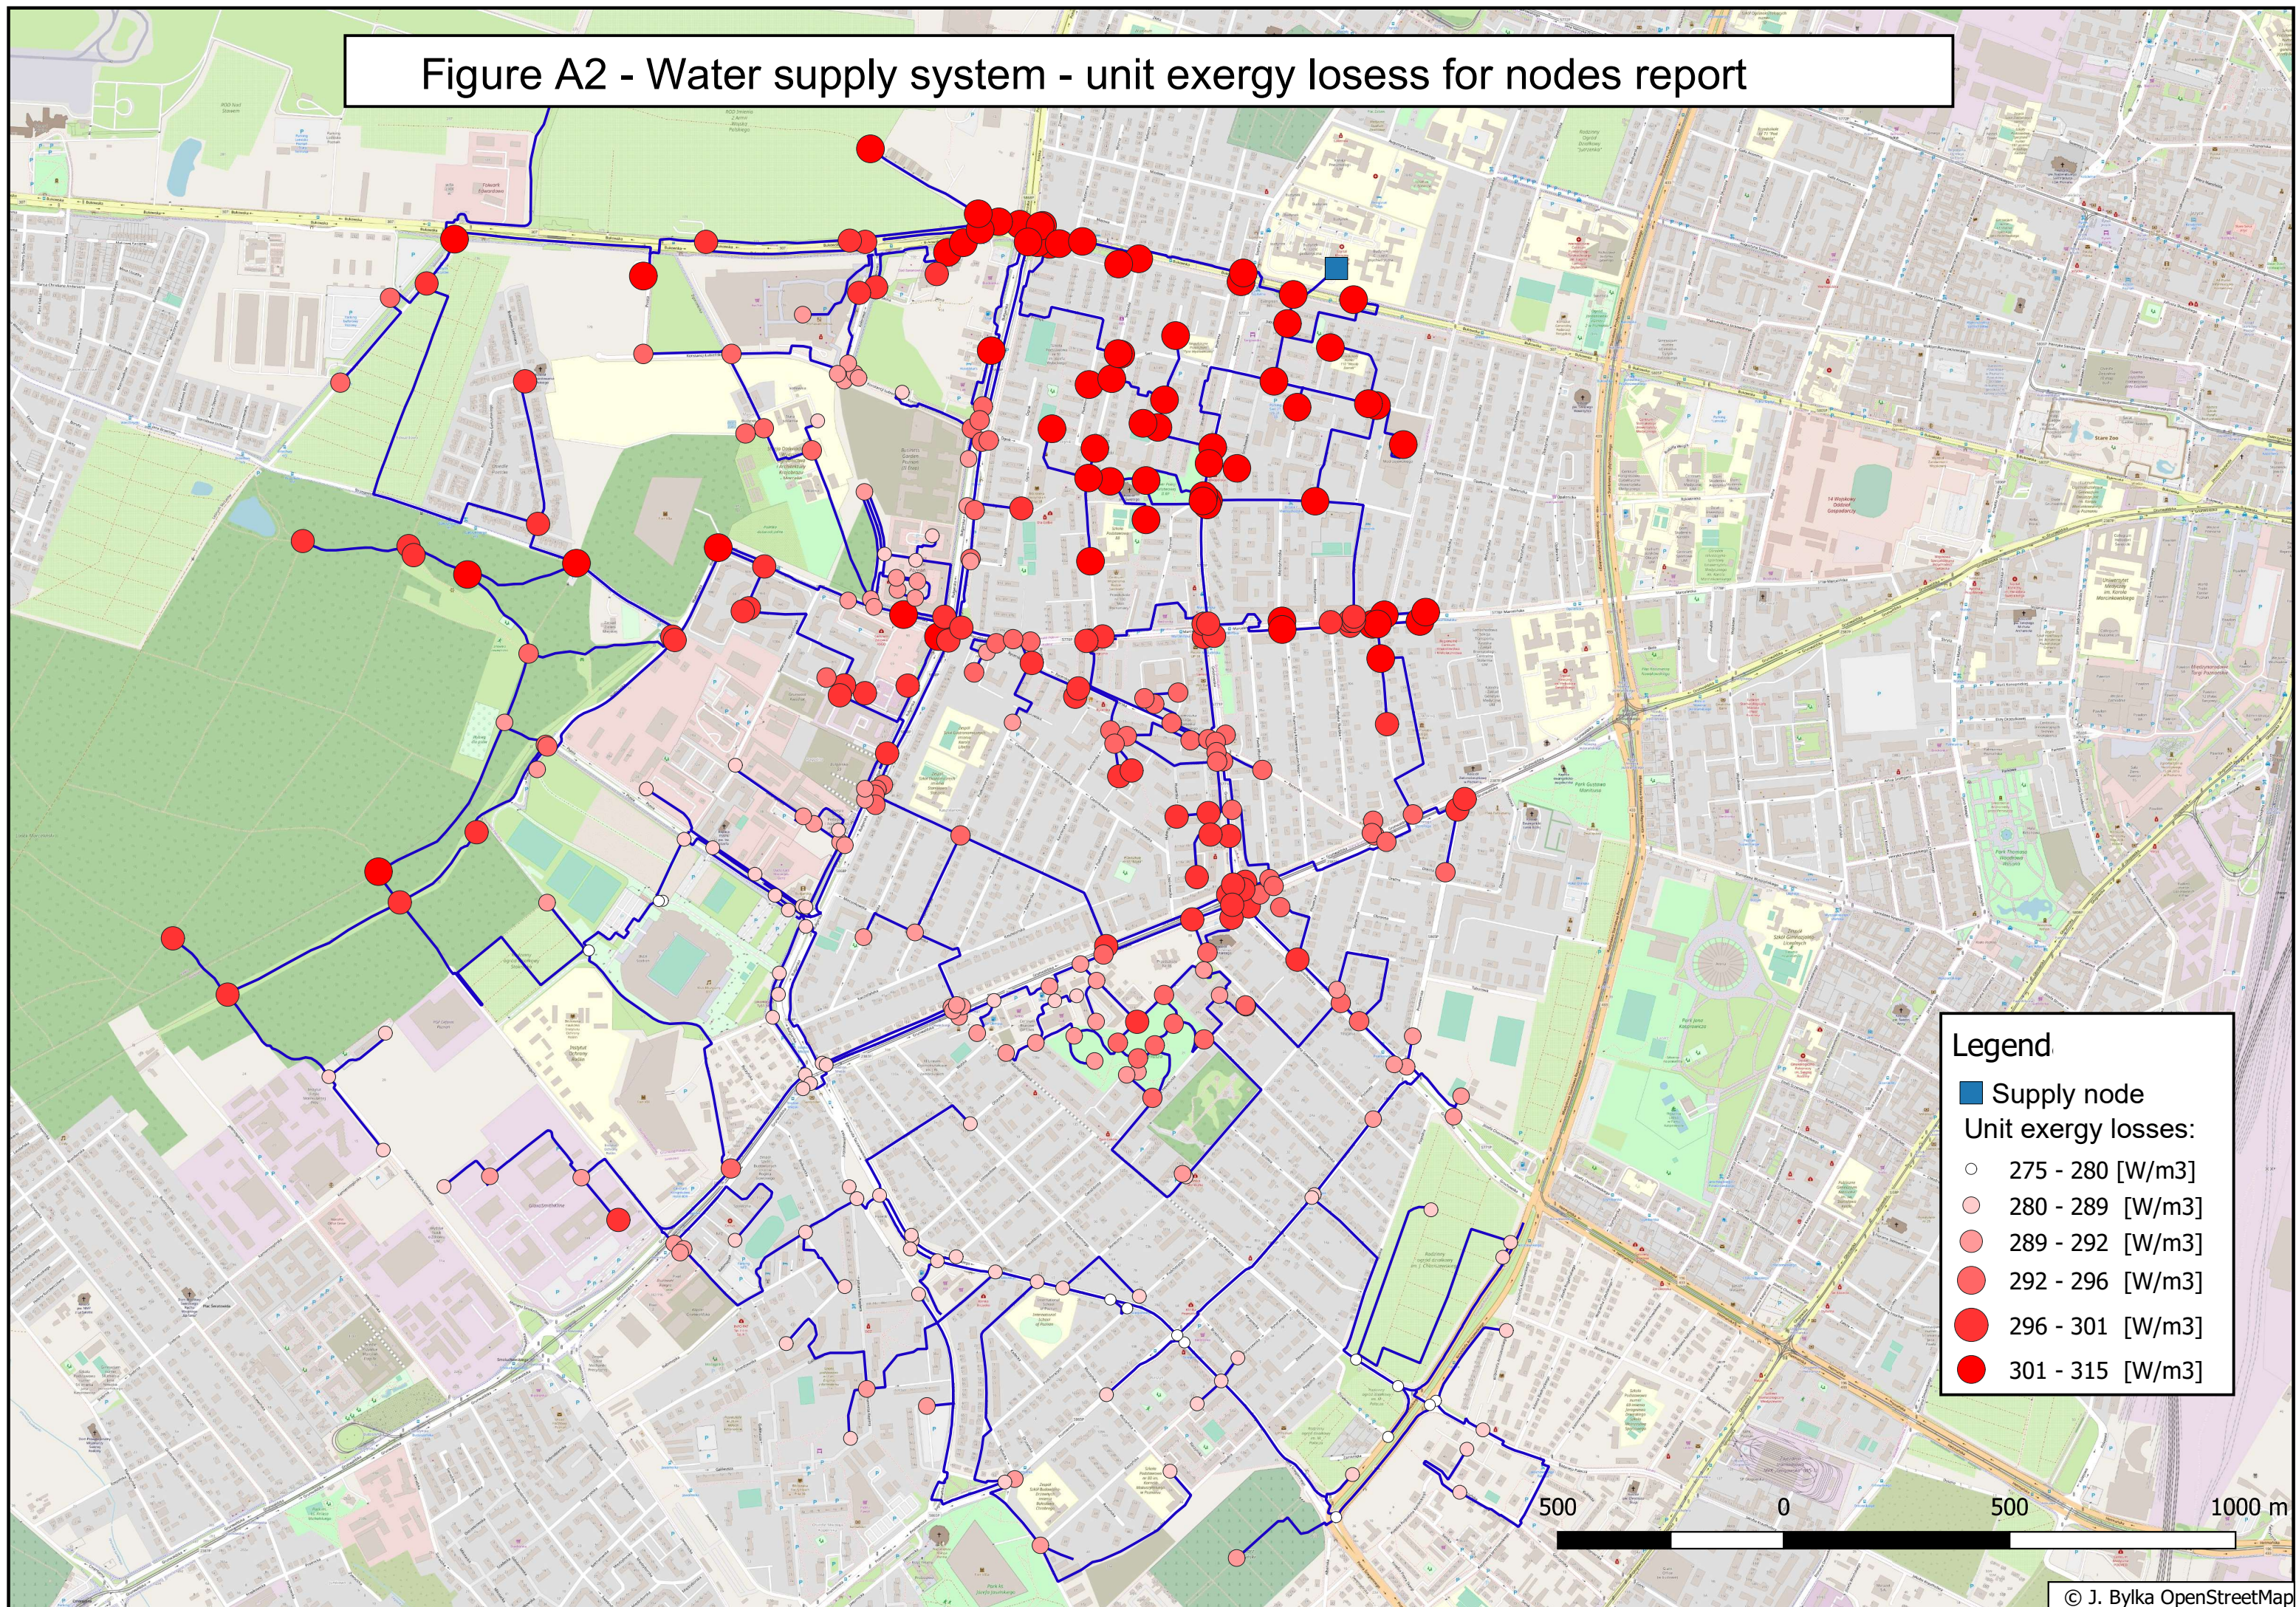



Figure A3 - Water supply system - unit exergy lossess for nodes report (heat map)

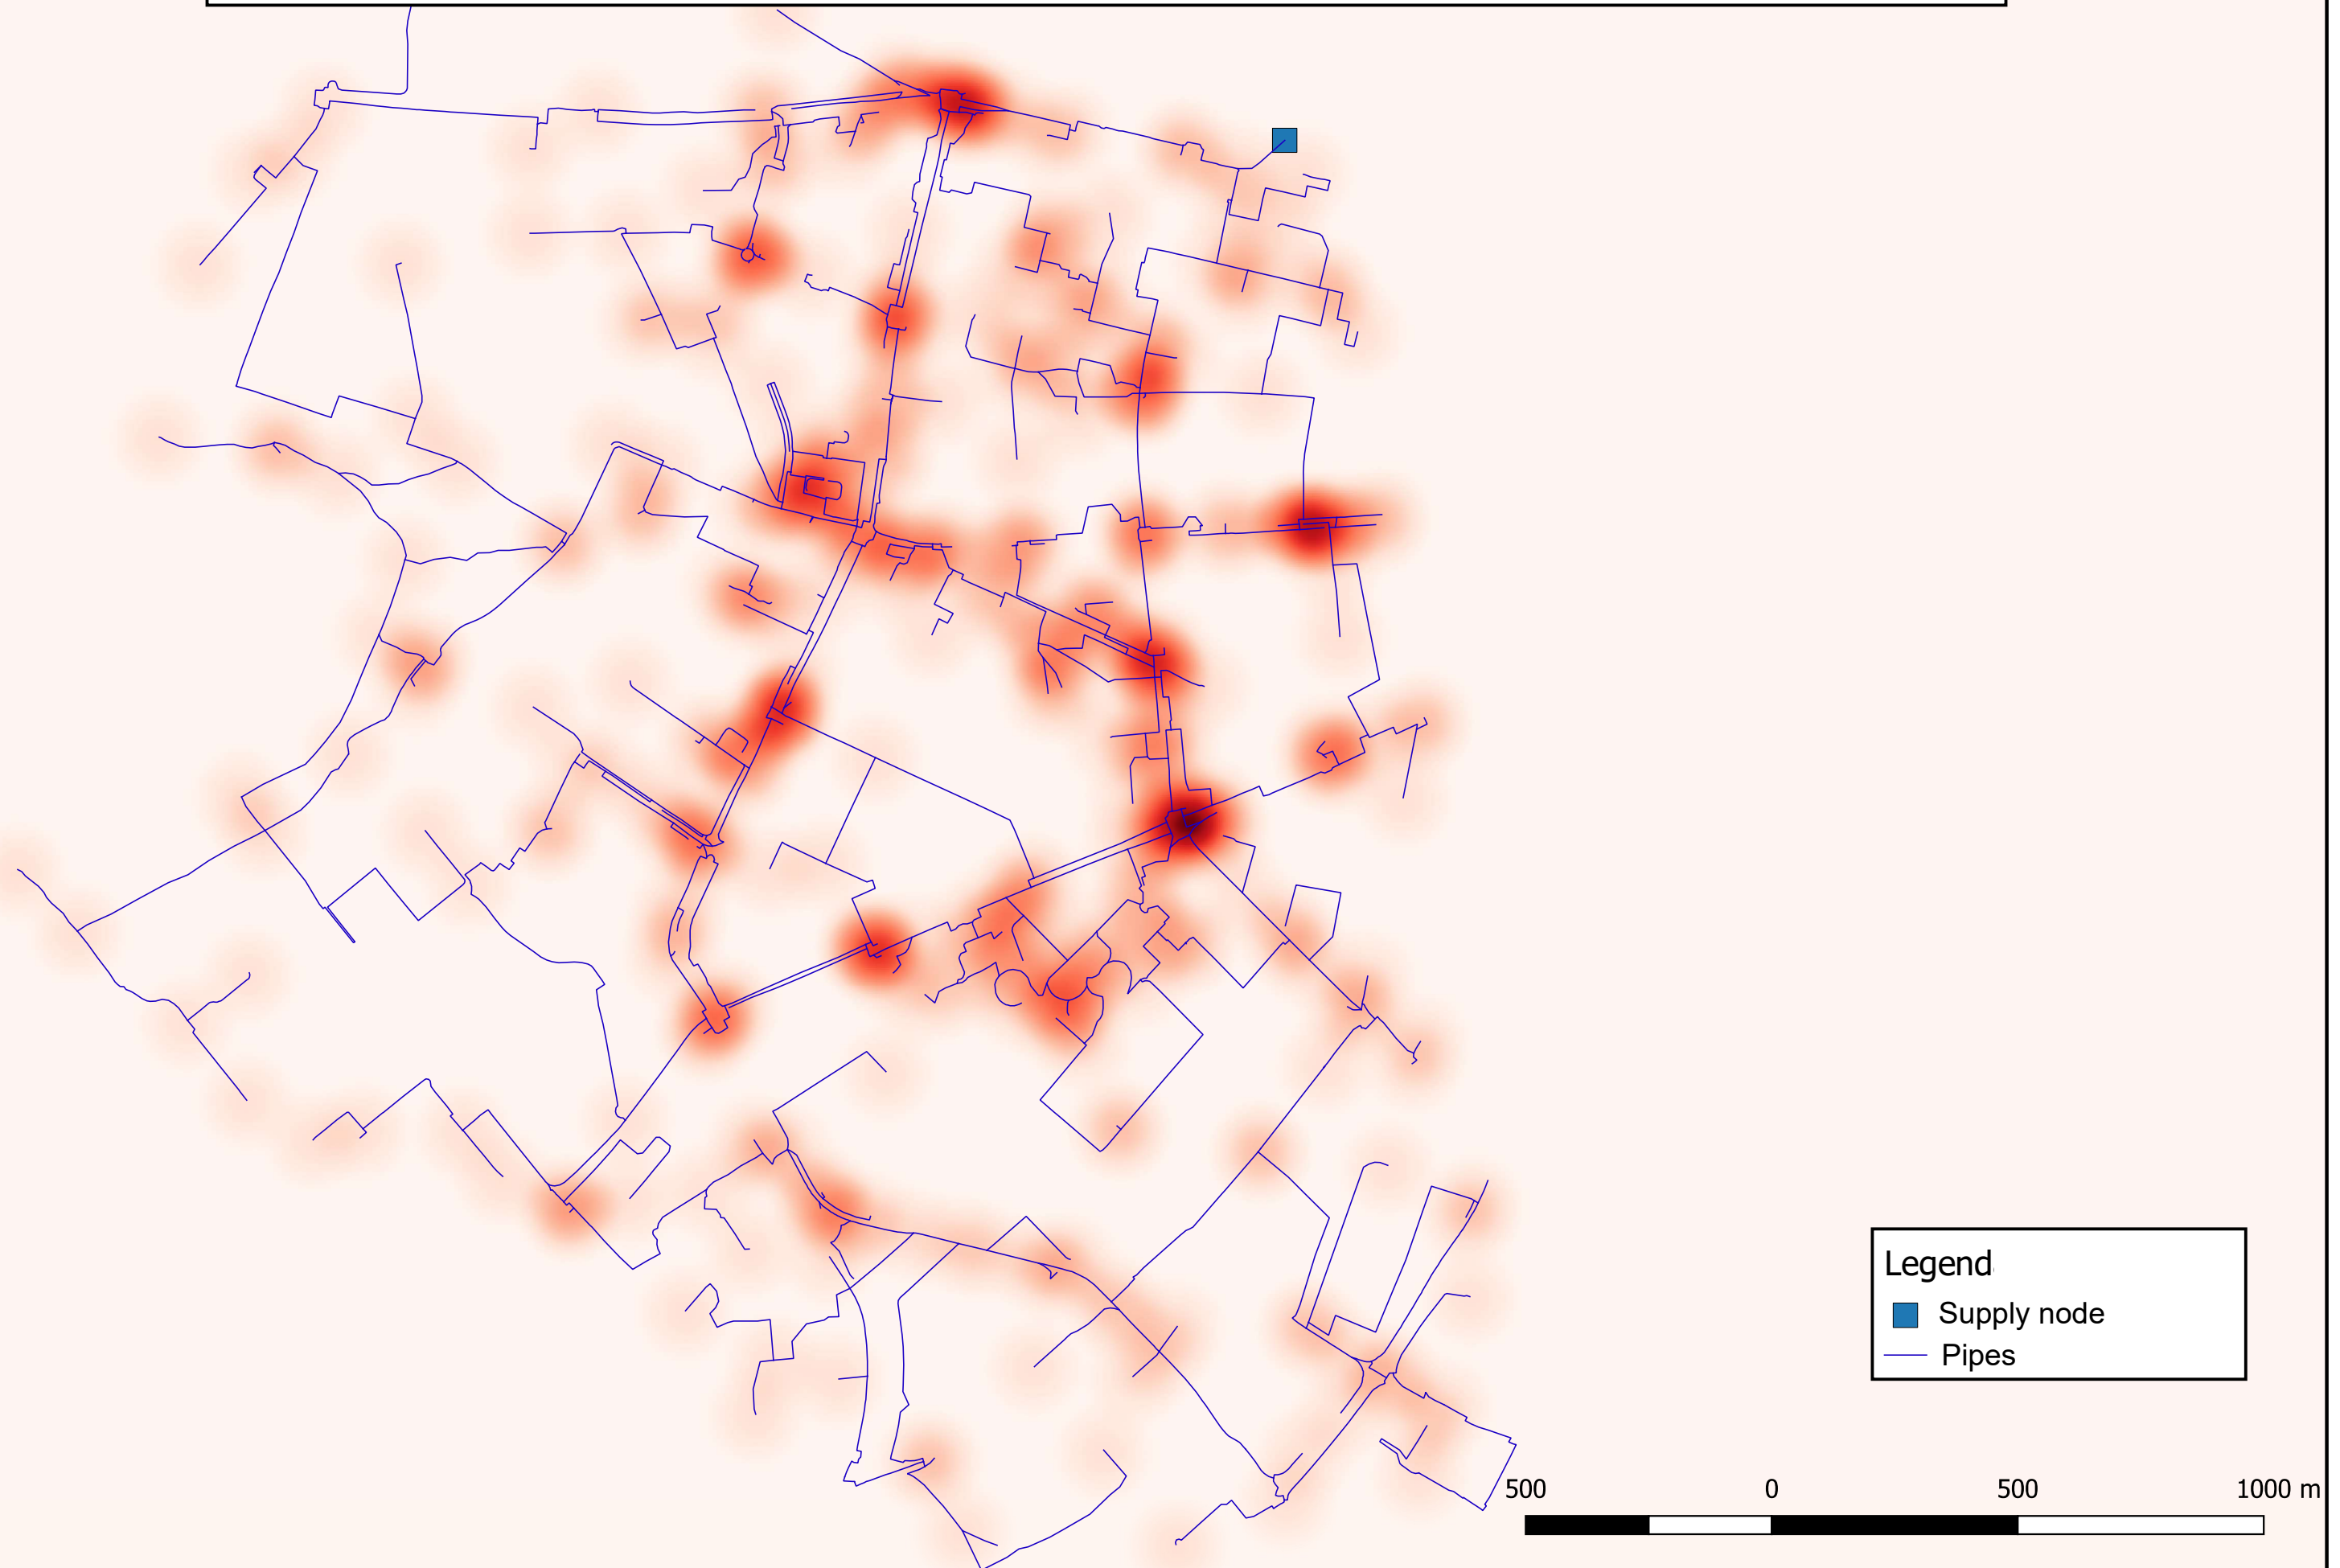

Figure A4 - Water treatment station - unit exergy losses report

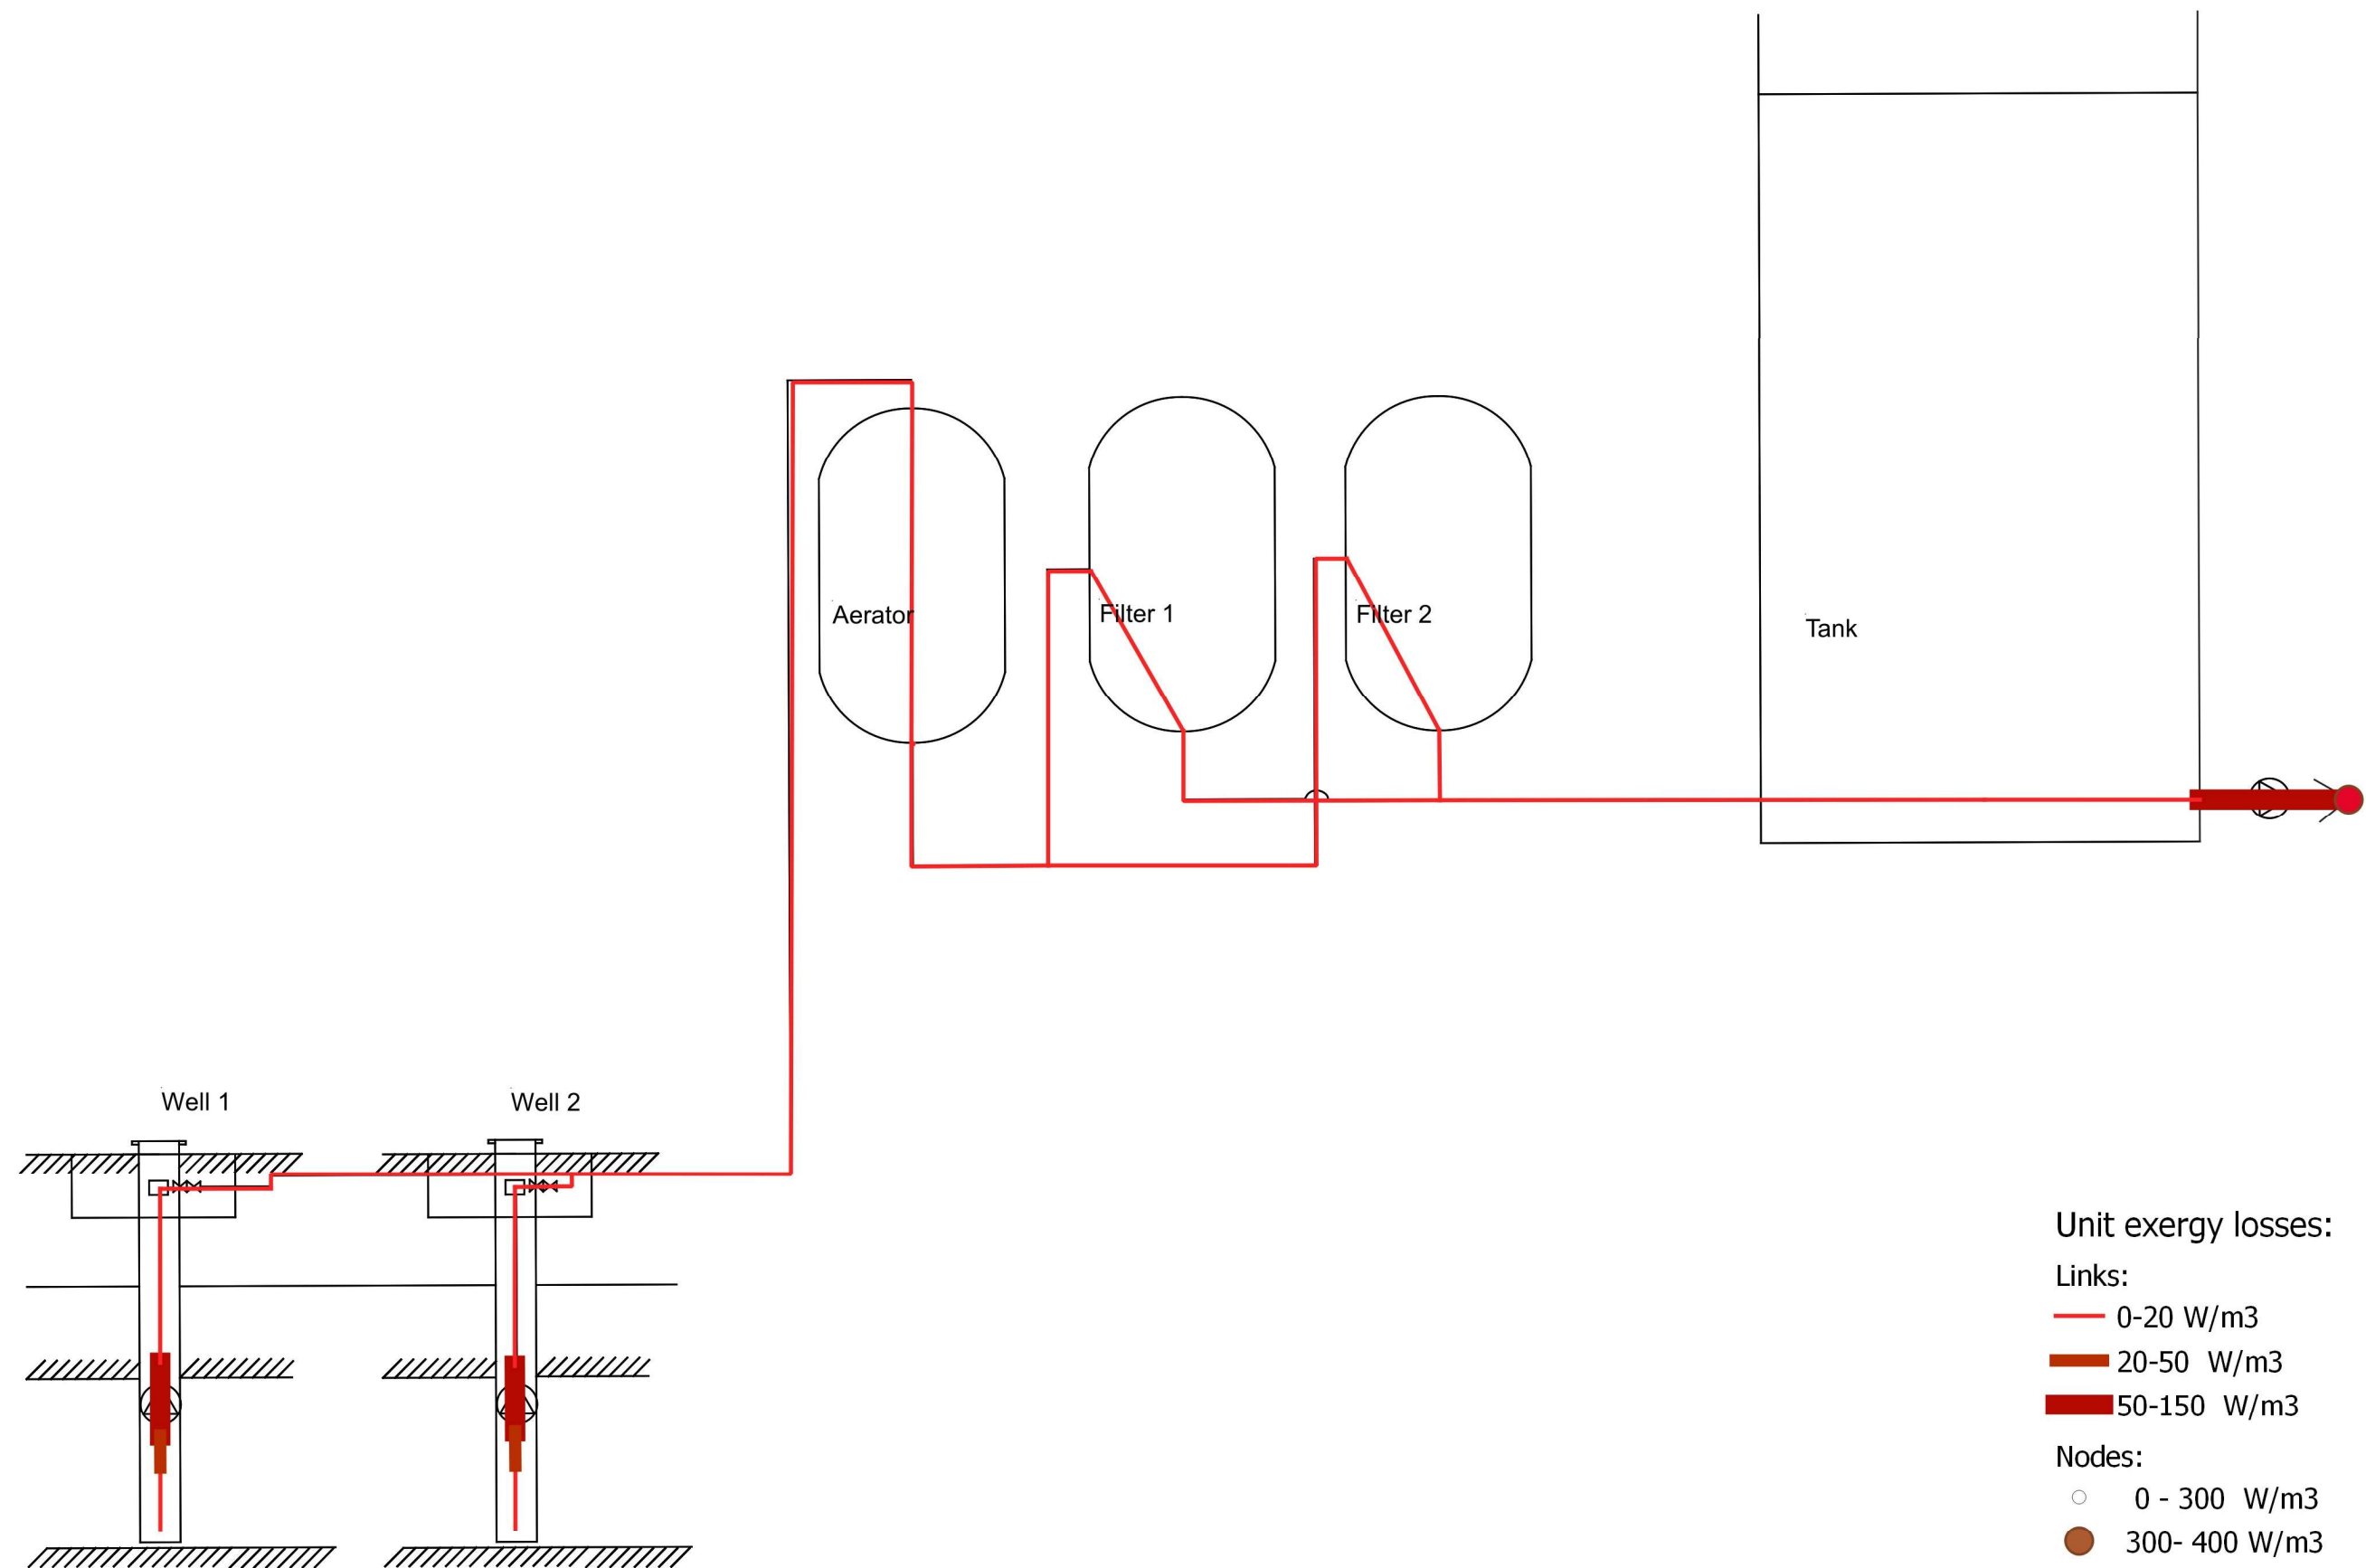

Supplement: s1 [file s1]
