# Supplementary material
Source: MDPI journal article supplement (https://www.mdpi.com/1996-1073/13/23/6221)
Supplement: s1 [file s1]

## Attachment 2 – list of symbols:

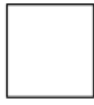

Water source  
(ground water / surface water)

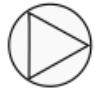

Pumps

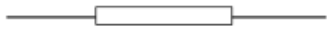

Pipes

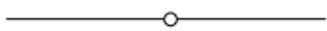

Nodes

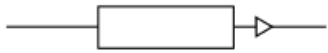

Minor headloss (eg. valves, fittings)

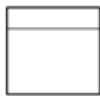

Tank

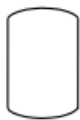

Devices
